# Supplementary material
Source: PubMed Central journal article supplement (PMC3923622)
Supplement: NIHMS540991-supplement-CRF2.pdf [file NIHMS540991-supplement-CRF2.pdf]

**MEDICAL HISTORY QUESTIONNAIRE**  
NIAID AIDS CLINICAL TRIALS GROUP

|                 |                                                                                                                                                                                 |                                        |                                                                                                                               |                                           |                                                                                                                               |
|-----------------|---------------------------------------------------------------------------------------------------------------------------------------------------------------------------------|----------------------------------------|-------------------------------------------------------------------------------------------------------------------------------|-------------------------------------------|-------------------------------------------------------------------------------------------------------------------------------|
| Patient Number  | <input type="text"/>         | Date Specimen(s)<br>Obtained/Scheduled | <input type="text"/> <input type="text"/> <input type="text"/>                                                                | <input type="text"/> <input type="text"/> | <input type="text"/> <input type="text"/> <input type="text"/> <input type="text"/> <input type="text"/> <input type="text"/> |
|                 |                                                                                                                                                                                 | mmm                                    | dd                                                                                                                            | yyyy                                      |                                                                                                                               |
| Protocol Number | <input type="text" value="A"/> <input type="text" value="5"/> <input type="text" value="2"/> <input type="text" value="5"/> <input type="text" value="3"/> <input type="text"/> | Institution Code                       | <input type="text"/> <input type="text"/> <input type="text"/> <input type="text"/> <input type="text"/> <input type="text"/> |                                           |                                                                                                                               |
| Form Week       | <input type="text"/> <input type="text"/> <input type="text"/> <input type="text"/>                                                                                             | * Seq. No.                             | <input type="text"/> <input type="text"/>                                                                                     | ** Step No.                               | <input type="text"/> <input type="text"/>                                                                                     |
|                 |                                                                                                                                                                                 | Key Operator Code                      | <input type="text"/> <input type="text"/> <input type="text"/>                                                                |                                           |                                                                                                                               |

\* Enter a '1' if this is the first of this form for this date. Designate subsequent forms on the same date with a 2, 3, etc.  
 \*\* Enter the subject's current study step number. Enter '1' if the study does not have multiple steps.

**INSTRUCTIONS:**

- Complete the questionnaire as a face-to-face interview.
- If the participant does not answer a question, use '-1' to indicate 'Not done.'

1. Was the questionnaire conducted as a face-to-face interview? ..... (1-Yes, 2-No)

**If No**, go to 'b.'  
**If Yes**, complete 'a.'

a. Is the person responding to these questions someone other than the study participant? ..... (1-Yes, 2-No)

**If No**, go to question 2.  
**If Yes**, complete 'a1' and go to question 2.

a1. Who is responding to the questions? .....

1-Parent

2-Spouse or partner

3-Friend

4-Other relative, specify

9-Other, specify

**If 4 or 9**, specify [70]: \_\_\_\_\_

b. Indicate the reason why:.....

1-Study participant refused

2-There was not enough time

9-Other reason, specify

**If 1, 2 or 3**, STOP.  
**If 4**, go to question 2.  
**If 9**, complete 'b1' and STOP.

b1. **If 9**, specify [70]: \_\_\_\_\_

2. Indicate the language used to conduct the interview [70]: \_\_\_\_\_

**MEDICAL HISTORY QUESTIONNAIRE**

Pt. No.        \*Seq. No.   \*\*Step No.   Date        
mmm dd yyyy

**IDENTIFYING INFORMATION**

3. What is your occupation? .....
- 1-Skilled worker (e.g. doctor, teacher)
  - 2-Semi-skilled worker (e.g. clerk, salesperson)
  - 3-Unskilled worker (e.g. laborer, farmer, street vendor)
  - 4-Student or child
  - 9-Other, specify

**If Other**, specify [70]: \_\_\_\_\_

**HISTORY/STATUS OF PRESENT ILLNESS**

4. Are you currently hospitalized? ..... (1-Yes, 2-No)   
**If No**, go to question 5.  
**If Yes**, continue.

a. Date admitted to this hospital for this hospitalization (mmm/dd/yyyy): .....

5. In the past 30 days, have you had a cough? ..... (1-Yes, 2-No, 3-Not known)   
**If No or Not known**, go to question 6.  
**If Yes**, continue.

a. How long has this cough lasted? .....    days  
**If greater than or equal to 28 days**, continue.  
**If less than 28 days**, go to 'b.'

a1. Has your cough worsened in the past month? ..... (1-Yes, 2-No, 3-Not known)

b. Are you producing sputum with this cough? ..... (1-Yes, 2-No, 3-Not known)

c. Have you had trouble sleeping because of the cough? ..... (1-Yes, 2-No, 3-Not known)

d. Do you cough at least once every day? ..... (1-Yes, 2-No, 3-Not known)

e. Did you have a cough in the past 24 hours? ..... (1-Yes, 2-No, 3-Not known)

6. In the past 30 days, have you had a fever? ..... (1-Yes, 2-No, 3-Not known)   
**If No or Not known**, go to question 7.  
**If Yes**, continue.

a. How many days has your fever lasted? .....    days

b. Did you have a fever in the past 24 hours? ..... (1-Yes, 2-No, 3-Not known)



MEDICAL HISTORY QUESTIONNAIRE

Pt. No.       \*Seq. No.   \*\*Step No.   Date

mmm      dd      yyyy

In the past 30 days, have you had any of the following other symptoms?  
 (Answer '1-Yes,' '2-No' or '3-Not known' to each question.) (1-Yes, 2-No, 3-Not known)

- 15. Nausea or vomiting? .....
- a. **If Yes**, have you had nausea or vomiting in the past 24 hours? .....
- 16. Abdominal pain? .....
- a. **If Yes**, have you had abdominal pain in the past 24 hours? .....
- 17. Loss of appetite? .....
- a. **If Yes**, have you lost your appetite in the past 24 hours? .....
- 18. Burning when you urinate? .....
- a. **If Yes**, have you had burning when you urinate in the past 24 hours? .....
- 19. Blood in your urine? .....
- a. **If Yes**, have you had blood in your urine in the past 24 hours? .....
- 20. Sores on your penis or vagina? .....
- a. **If Yes**, have you had sores on your penis or vagina in the past 24 hours? .....
- 21. Pain, numbness, or tingling in your feet? .....
- a. **If Yes**, have you had pain, numbness, or tingling in your feet in the past 24 hours? .....
- 22. Itching or rash? .....
- a. **If Yes**, have you had itching or a rash in the past 24 hours? .....
- 23. Pain in your muscles, joints, or bones? .....
- a. **If Yes**, have you had pain in your muscles, joints, or bones in the past 24 hours? ..
- 24. Difficulty with vision? .....
- a. **If Yes**, have you had difficulty with your vision in the past 24 hours? .....
- 25. Headache? .....
- a. **If Yes**, have you had a headache in the past 24 hours? .....
- 26. Muscle weakness? .....
- a. **If Yes**, have you had muscle weakness in the past 24 hours? .....
- 27. Fatigue? .....
- a. **If Yes**, have you been fatigued in the past 24 hours? .....

**MEDICAL HISTORY QUESTIONNAIRE**

Pt. No.        \*Seq. No.   \*\*Step No.   Date        
mmm dd yyyy

In the past 30 days, have you had any of the following other symptoms?  
 (Answer '1-Yes,' '2-No' or '3-Not known' to each question.) (1-Yes, 2-No, 3-Not known)

- 28. Difficulty sleeping? .....
- a. **If Yes**, have you had difficulty sleeping in the past 24 hours? .....
- 29. Dizzy or lightheaded? .....
- a. **If Yes**, have you been dizzy or lightheaded in the past 24 hours? .....
- 30. Trouble thinking or concentrating? .....
- a. **If Yes**, have you had trouble thinking or concentrating in the past 24 hours? .....
- 31. Feeling depressed or sad? .....
- a. **If Yes**, have you felt depressed or sad in the past 24 hours? .....
- 32. Shaking chills? .....
- a. **If Yes**, have you had shaking chills in the past 24 hours? .....
- 33. Decreased hearing? .....
- a. **If Yes**, have you had decreased hearing in the past 24 hours? .....

34. Do you currently have any of the above symptoms (questions 10-33)? (1-Yes, 2-No, 3-Not known)   
**If No or Not known**, go to question 35.  
**If Yes**, continue.

- a. On a scale of 1-10, how severe are the symptoms you have right now?  
 "1" means that your symptoms do not bother you at all.    
 "10" means that they are very bad. ....
- b. How long have your most annoying symptoms been at this level? .....   days
- c. Of the above symptoms (questions 10-33), which is your most annoying symptom?  
 (Record the number from 10-33 corresponding to the single most annoying symptom.)
- d. Specify the most annoying symptom [70]:
